# Supplementary material for: Propelling polysulfide redox conversion by d-band modulation for high sulfur loading and low temperature lithium–sulfur batteries
Source: Royal Society of Chemistry journal article supplement (doi:10.1039/d1ta04870h), 2021-01-01
Supplement: d1ta04870h1.pdf [file d1ta04870h1.pdf]

**Supporting Information to**

**Propelling Polysulfide Redox Conversion by *d*-band modulation for High Sulfur  
Loading and Low Temperature Lithium-Sulfur Batteries**

*Pan Zeng,<sup>1</sup> Cheng Liu,<sup>1</sup> Chen Cheng,<sup>1</sup> Cheng Yuan,<sup>1</sup> Kehua Dai,<sup>2</sup> Jing Mao,<sup>3</sup> Lirong Zheng,<sup>4</sup> Jing Zhang,<sup>4</sup> Lo-  
Yueh Chang,<sup>5</sup> Shu-Chih Haw,<sup>5</sup> Ting-Shan Chan,<sup>\*5</sup> Haiping Lin,<sup>1</sup> and Liang Zhang<sup>\*,1</sup>*

1. Institute of Functional Nano & Soft Materials (FUNSOM), Jiangsu Key Laboratory for Carbon-Based Functional Materials & Devices, Soochow University, 199 Ren'ai Road, Suzhou 215123, China

2. College of Chemistry, Tianjin Normal University, Tianjin 300387, China

3. School of Materials Science and Engineering, Zhengzhou University, Zhengzhou 450001, China

4. Beijing Synchrotron Radiation Facility, Institute of High Energy Physics, Chinese Academy of Sciences, Beijing 100049, China

5. National Synchrotron Radiation Research Center, Hsinchu 30076, Taiwan

Email: liangzhang2019@suda.edu.cn (L.Z.); chan.ts@nsrrc.org.tw (T.S.C)

## Experimental Section

*Synthesis of Ni<sub>3</sub>Fe@HPC-CNT:* The Ni<sub>3</sub>Fe@HPC-CNT composite was prepared using a simple sol-gel method. In a typical synthesis process, 0.75 mmol Ni(NO<sub>3</sub>)<sub>2</sub>·6H<sub>2</sub>O (Aladdin, 99.99%) and 0.25 mmol Fe(NO<sub>3</sub>)<sub>3</sub>·9H<sub>2</sub>O (Aladdin, 99.99%) were dissolved in 30 mL N, N-dimethylformamide (Aladdin, 99.95%) solutions containing 1 g terephthalic acid (Aldrich, 99.99%) and strongly stirred at 30 °C for 0.5 h. Then, 2 mL tetraethyl orthosilicate (TEOS, Aladdin, 99.99%) was slowly added into above prepared solutions, and the final mixture solutions were stirred for another 0.5 h at the same temperature. The obtained claybank solutions were then heated at 40 °C and 80 °C for 36 h in an oven, respectively, for the thermopolymerization and sol-gel process. After heating of 72 h in an oven, the black gel was formed. It was then carbonized at 900 °C for 3 h in nitrogen atmosphere with a heating rate of 5 °C min<sup>-1</sup>. The as-obtained black powders were then immersed in diluted hydrofluoric acid solutions (aladdin, 40 wt.% in H<sub>2</sub>O) under stirring for 24 h, and then washed with anhydrous ethanol and deionized water, resulting in the formation of Ni<sub>3</sub>Fe@HPC-CNT. The Ni@HPC-CNT and Fe@HPC-CNT were also prepared with only involvement of Ni(NO<sub>3</sub>)<sub>2</sub>·6H<sub>2</sub>O or Fe(NO<sub>3</sub>)<sub>3</sub>·9H<sub>2</sub>O as the metal source.

*Preparation of Ni<sub>3</sub>Fe@HPC-CNT modified Separator:* The modified separator was fabricated by conventional doctor blade method. Briefly, 80 wt% Ni<sub>3</sub>Fe@HPC-CNT, 10 wt% acetylene black and 10 wt% polyvinylidene fluoride (PVDF) was manually grinded in N-methyl-2-pyrrolidone (NMP) to form the slurry. Then, the slurry was coated onto the pristine separator (Celgard 2500) and dried at 80 °C in an oven for 12 h. The obtained Ni<sub>3</sub>Fe@HPC-CNT modified separator was cut into discs with a diameter of 19 mm. The areal loading of Ni<sub>3</sub>Fe@HPC-CNT coating layer is about 0.3 mg cm<sup>-2</sup>. For comparison, Ni@HPC-CNT modified separator, Fe@HPC-CNT modified separator and PP separator without coating layer were also used as the comparison separators in Li-S batteries. In addition, to exclude the effect of carbon in the composite, acetylene black-carbon nanotube (AC) modified separator was also fabricated, which contains 80 wt% acetylene black, 10 wt% carbon nanotube and 10 wt% PVDF.

*Preparation of Pure Sulfur Cathodes:* For the cathode with a sulfur loading of  $\sim 1.5 \text{ mg cm}^{-2}$  with a diameter of 12 mm, 70 wt% sulfur, 20 wt% acetylene black and 10 wt% PVDF were mixed in NMP to form a slurry, which was then coated on the carbon coated aluminum foil as cathode and dried at  $60 \text{ }^\circ\text{C}$  for one night. Other than low sulfur loading cathode, the high sulfur loading cathodes ( $18.3$  and  $30 \text{ mg cm}^{-2}$ ) were prepared by titration method. Initially, 90 wt% sulfur and 10 wt% conductive carbon were ultrasonically dispersed in 10 mL NMP for 2 h. Then, the as-prepared mixture solutions were dripped into the carbon fiber and dried at  $60 \text{ }^\circ\text{C}$  for 24 h. The different sulfur loadings in Li-S batteries were determined by adjusting the dripping volume of mixture solutions.

*Preparation of  $\text{Ni}_3\text{Fe@HPC-CNT/S}$  cathodes:* The battery performance of Li-S battery using S/ $\text{Ni}_3\text{Fe@HPC-CNT}$  cathode with pristine separator was investigated. The S/ $\text{Ni}_3\text{Fe@HPC-CNT}$  cathodes were prepared by melting-diffusion method. The  $\text{Ni}_3\text{Fe@HPC-CNT}$  and sulfur were mixed with a mass ratio of 2:3 and ground in mortar, sealing in a glass vial and heat under  $155^\circ\text{C}$  for 12 h. Then, the obtained S/ $\text{Ni}_3\text{Fe@HPC-CNT}$  composite, acetylene black and PVDF were well mixed with a mass ratio of 8:1:1 in NMP to form the slurry. The composite electrodes were fabricated by coating the slurry on carbon coated aluminum foil with a mass loading of  $\sim 1 \text{ mg cm}^{-2}$ . The lithium disk was used as counter electrode while the Celgard 2500 was used as separator. 1.0 M LiTFSI + 2.0 wt%  $\text{LiNO}_3$  dissolved in DOL/DME (V/V = 1:1) solvent used as the electrolytes. For comparison, AC/S cathodes were also fabricated via the above method.

*Visualized adsorption experiments:* The  $\text{Li}_2\text{S}_6$  solutions were prepared by dissolving a mixture of sulfur and lithium sulfides ( $\text{Li}_2\text{S}$ ) with a stoichiometric ratio of 5:1 in 1, 2-dimethoxyethane (DME), and then continuously stirring for 48 h at  $60 \text{ }^\circ\text{C}$  in the glove box. The concentration of  $\text{Li}_2\text{S}_6$  solutions was controlled at 5 mM. The  $\text{Ni}_3\text{Fe@HPC-CNT}$ ,  $\text{Fe@HPC-CNT}$ ,  $\text{Ni@HPC-CNT}$  and AC powders with same weight of 10 mg were then added into the 2 mL  $\text{Li}_2\text{S}_6$  solutions, respectively. To sufficient adsorb the  $\text{Li}_2\text{S}_6$  solutions, the above-mentioned mixture solutions were stirred for 24 h and then standing for 12 h for the UV-visible absorption experiments.

*Assembly of  $\text{Li}_2\text{S}_6$  symmetric cells:* To assemble symmetrical cells, 1 M bis(trifluoroethanesulfonyl)imide lithium (LiTFSI) with 0.2 M  $\text{Li}_2\text{S}_6$  in DME/DOL solutions (V/V = 1:1) was used as electrolytes, and the mixture of  $\text{Ni}_3\text{Fe@HPC-CNT}$  (or  $\text{Fe@HPC-CNT}$ ,  $\text{Ni@HPC-CNT}$ , AC) and PVDF with a weight ratio of 9:1 as both the working electrode and counter electrode. The voltage range for cyclic voltammetry (CV) tests of symmetric cells was -1 to 1 V with a scan rate of  $3 \text{ mV s}^{-1}$ .

*$\text{Li}_2\text{S}$  nucleation measurements:* The electrode was prepared by mixing active materials ( $\text{Ni}_3\text{Fe@HPC-CNT}$  or AC) and PVDF with a weight ratio of 9:1 in NMP solvent followed by coating the slurry onto the carbon coated aluminum foil. The  $\text{Li}_2\text{S}_8$  solutions (0.2 M) were prepared by mixing  $\text{Li}_2\text{S}$  and S at a stoichiometric ratio of 1:7 in tetraglyme, with vigorous stirring for 24 h at  $60 \text{ }^\circ\text{C}$ . Precipitation experiments of  $\text{Li}_2\text{S}$  on  $\text{Ni}_3\text{Fe@HPC-CNT}$  and AC were investigated in 2032-type coin cells with Celgard 2500 PP membrane as separator.  $20 \text{ }\mu\text{L}$  of  $\text{Li}_2\text{S}_8$  (0.2 M) was dropped onto the cathode, the metal lithium was used as anode side. The cells were discharged galvanostatically to 2.06 V at 0.1 mA and then maintained potentiostatically at 2.05 V for the nucleation of  $\text{Li}_2\text{S}$  until the current dropped below  $10^{-5} \text{ A}$ . The nucleation capacity of  $\text{Li}_2\text{S}$  can be calculated by the integral area of the plotted curve through Faraday's Law.

*Electrochemical Measurements:* Electrochemical properties were investigated by using CR2032 coin-type cells, where the pure sulfur electrode applied as the cathode, lithium disk with a diameter of 16 mm worked as the anode (the thickness of lithium anode is  $0.45 \text{ }\mu\text{m}$ ), the prepared modified separator served as the separator, and 1.0 M LiTFSI + 2.0 wt%  $\text{LiNO}_3$  dissolved in DOL/DME (V/V = 1:1) solvent as the electrolytes. For the low sulfur cathode ( $\sim 1.5 \text{ mg cm}^{-2}$ ), the amount of electrolytes used in Li-S battery was maintained at electrolyte/sulfur ratio of about  $15 \text{ }\mu\text{L mg}^{-1}$ . For the high sulfur cathode ( $18.3, 30 \text{ mg cm}^{-2}$ ), the amount of electrolytes used in Li-S battery was maintained at electrolyte/sulfur ratio of about  $7 \text{ }\mu\text{L mg}^{-1}$ . CV measurements and electrochemical impedance spectrometry (EIS) test were performed using AUTOLAB PGSTAT302N electrochemical workstation. The scan

rate and voltage range of CV measurements were 0.1 mV s<sup>-1</sup> and 1.7-2.8 V, respectively. The EIS was studied at the open-circuit condition in a frequency range of 100 kHz to 10 mHz. The galvanostatic charge/discharge and rate performance tests were measured by CT2001A battery-test instrument with a voltage window of 1.7-2.8 V.

*Ionic conductivity:* The ionic conductivity of PP separator, Ni@HPC-CNT, Fe@HPC-CNT and Ni<sub>3</sub>Fe@HPC-CNT modified separators was calculated from EIS using AUTOLAB PGSTAT302N electrochemical workstation. Either separator saturated with electrolyte was sandwiched between two stainless steel electrodes in coin cells, and its ionic conductivity was calculated according to the following equation:

$$\sigma = T/(R_0S)$$

in which  $\sigma$  stands for ionic conductivity,  $T$  is the thickness of the membrane,  $S$  represents the area of the stainless steel electrode, and  $R_0$  indicates the bulk Ohmic resistance of the electrolytes.

*Li ion diffusion coefficient:* The Li<sup>+</sup> diffusion coefficients were calculated by the Randles-Sevcik equation:

$$I_p = (2.69 \times 10^5) C_{Li}^+ D_{Li}^{+1/2} A v^{1/2} n^{3/2}$$

Where  $I_p$  is the peak current,  $C_{Li}^+$  (mol mL<sup>-1</sup>) is the Li<sup>+</sup> concentration in the electrolytes,  $D_{Li}^+$  is the Li<sup>+</sup> diffusion coefficient,  $A$  (cm<sup>2</sup>) is the electrode area,  $v$  (V s<sup>-1</sup>) is the scanning rate, and  $n$  ( $n = 2$ ) stands the number of electrons in the redox reactions.

*Materials Characterizations:* X-ray diffraction (XRD) tests were carried out on a DX-2600 diffractometer with (Cu K $\alpha$  radiation,  $\lambda = 1.5406 \text{ \AA}$ ). Raman spectra were acquired on a LabRAM HR with 532 nm laser excitation. Field-emission scanning electron microscopy (FE-SEM), and transmission electron microscopy (TEM) equipped with energy dispersive X-ray spectroscopy (EDS) measurements were performed on the JSM-5900LV and FEI Talos F200x instruments, respectively. The specific surface area, pore volume and pore size distribution of the samples were measured by the N<sub>2</sub> adsorption-desorption isotherms at 77 K using a 30 Micromeritics ASAP 2020 equipment. The thermogravimetric (TG) experiments were performed on a TG-209F1 under air atmosphere with a heating rate

of 10 °C min<sup>-1</sup>. Inductively coupled plasma-atomic emission spectrometry (ICP-AES) were measured on an Optima 4300DV. X-ray photoelectron spectroscopy analysis was performed on a PHI 5000 VersaProbe III with a monochromatic Al K $\alpha$  X-ray source, with a base pressure better than 5 $\times$ 10<sup>-7</sup> Pa. UV-vis spectra of the solutions were acquired on an ultraviolet and visible spectrophotometer (UV-3600). The Ni and Fe K-edge XAFS spectra were measured at beamline 17C1 of Taiwan Light Source and beamline 1W1B of Beijing Synchrotron Radiation Facility, The S K-edge XAFS spectra were measured at beamline 16A1 of Taiwan Light Source. The Ni and Fe L-edge XAFS spectra were measured at beamline 20A1 of Taiwan Light Source and beamline 02B02 of Shanghai Synchrotron Radiation Facility. The analysis of XAFS data was performed using the Athena software in Demeter package.

*Calculation method:* First principle DFT calculations were performed by the Vienna Ab initio Simulation Package (VASP)<sup>[1-2]</sup> with the projector augmented wave (PAW) method.<sup>[3]</sup> The exchange-functional was treated using the generalized gradient approximation (GGA) of Perdew-Burke-Ernzerhof (PBE)<sup>[4]</sup> functional. The energy cut off for the plane wave basis expansion was set to 400 eV and the force on each atom less than 0.05 eV/Å was set for convergence criterion of geometry relaxation. The self-consistent calculations applied a convergence energy threshold of 10<sup>-4</sup> eV. The Brillouin zone integration was performed using 3 $\times$ 3 $\times$ 1 Monkhorst and Pack k-point sampling through all the computational process. Considering the van der Waals's interaction, Grimmes's method (DFT-D3)<sup>[5]</sup> was included during the surface adsorption.

$$E_{\text{ads}} = E_{X^*} - E_X - E^*,$$

where X, \*, and X\* represents the adsorbate, substrate, and the adsorption system, respectively.

Climbing image nudged elastic band (CI-NEB) method<sup>[6,7]</sup> has been used for finding saddle points and minimum energy paths of Li ion diffusion and the decomposition of Li<sub>2</sub>S on the surface of composites.

The stability of different types of Ni-Fe alloy models are estimated by computing their formation energies ( $E_f$ ) as

follows,

$$E_f = (E_{total} - n_{Ni}\mu_{Ni} - n_{Fe}\mu_{Fe} - n_C\mu_C)/N$$

where  $E_{total}$  can be obtained from the optimized calculation,  $n_{Ni}$ ,  $n_{Fe}$ , and  $n_C$  are the numbers of Ni, Fe, and C atoms in the cell.  $N$  is the total number of these atoms.  $\mu_{Ni}$ ,  $\mu_{Fe}$ , and  $\mu_C$  are the chemical potentials of Ni, Fe, and C, respectively. To better simulate the experimental results, we have added a graphene layer on the surface of Ni, Fe, and  $Ni_3Fe$ .

### Supplementary References:

- [1] G. Kresse, J. Furthmüller, *Phys. Rev. B.* **1996**, *54*, 11169.
- [2] G. Kresse, J. Furthmüller, *Comp. Mater. Sci.* **1996**, *6*, 15.
- [3] P. E. Blöchl, *Phys. Rev. B.* **1994**, *50*, 17953.
- [4] J. P. Perdew, K. Burke, M. Ernzerhof, *Phys. Rev. Lett.* **1996**, *77*, 3865.
- [5] S. Grimme, J. Antony, S. Ehrlich, H. Krieg, *J. Chem. Phys.* **2010**, *132*, 154104.
- [6] M. C. Prentiss, D. J. Wales, P. G. Wolynes, *Plos. Comput. Biol.* **2010**, *6*, e1000835.
- [7] J. A. van den Ende, B. Ensing, H. M. Cuppen, *CrystEngComm* **2016**, *18*, 4420.

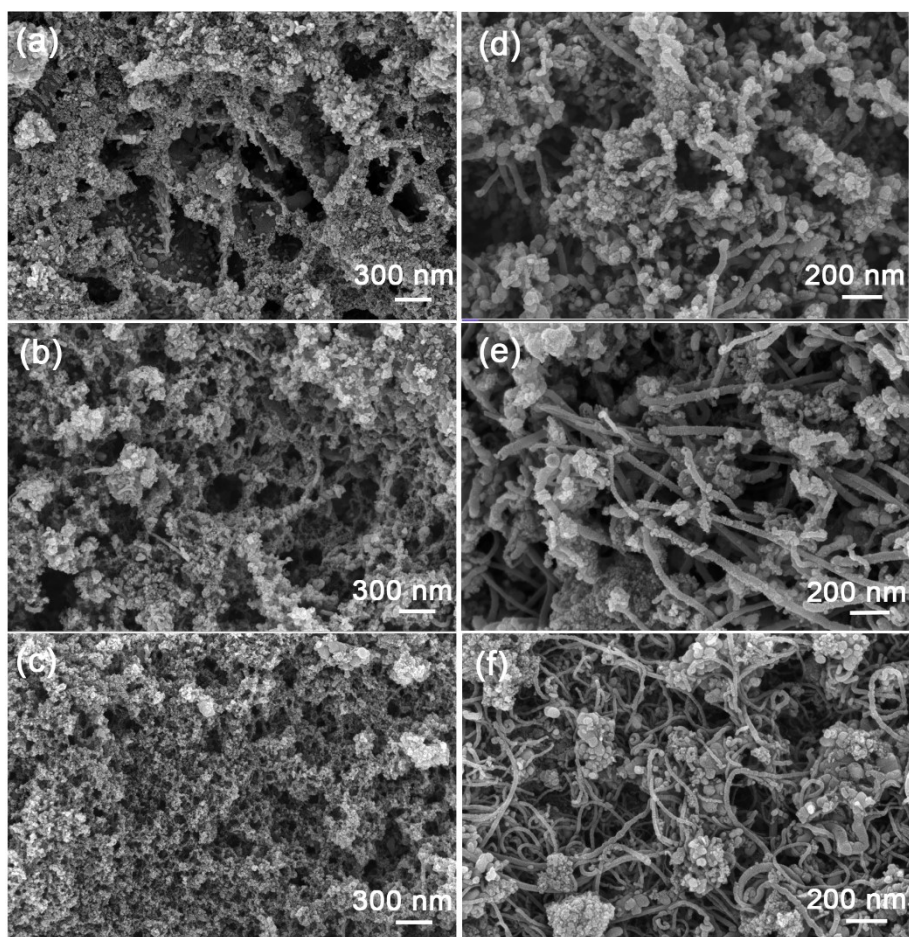

**Figure S1.** a, d) SEM images of Ni@HPC-CNT, b, e) Ni<sub>3</sub>Fe@HPC-CNT and c, f) Fe@HPC-CNT under different magnifications.

As shown in Figure S1, Ni@HPC-CNT, Ni<sub>3</sub>Fe@HPC-CNT and Fe@HPC-CNT samples exhibit a similar microstructure with three-dimensional interconnected porous framework with CNT in situ grown along the porous carbon.



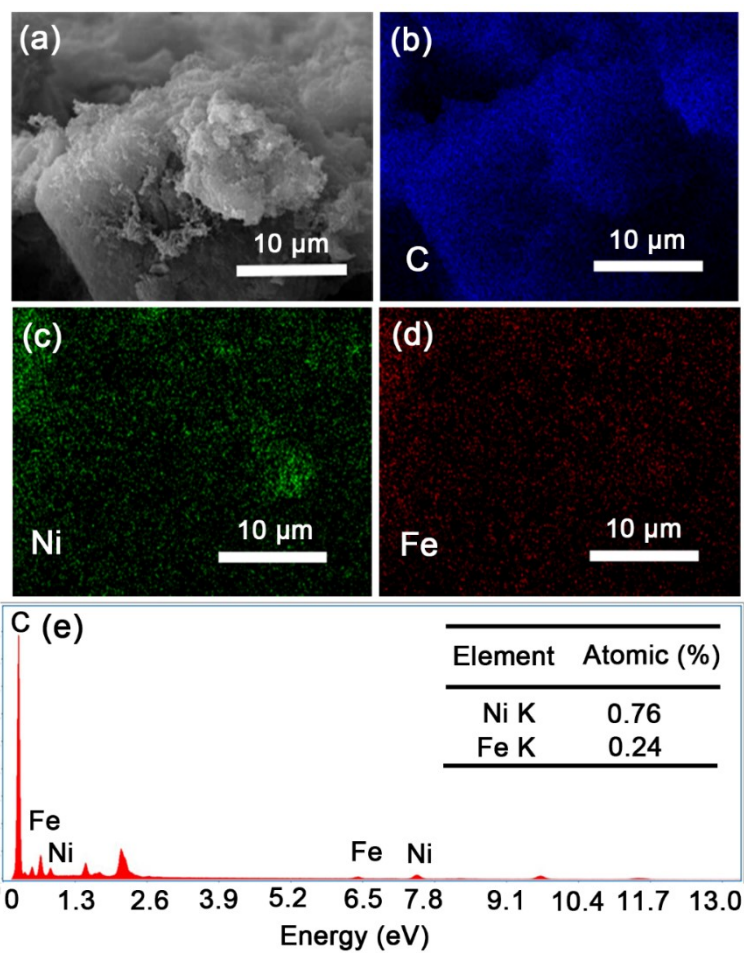

**Figure S2.** a) Field emission SEM image of  $\text{Ni}_3\text{Fe@HPC-CNT}$  and corresponding elemental mappings of b) C, c) Ni, and d) Fe. e) EDS spectrum of  $\text{Ni}_3\text{Fe@HPC-CNT}$  at a specific zone corresponding to Figure S2a.

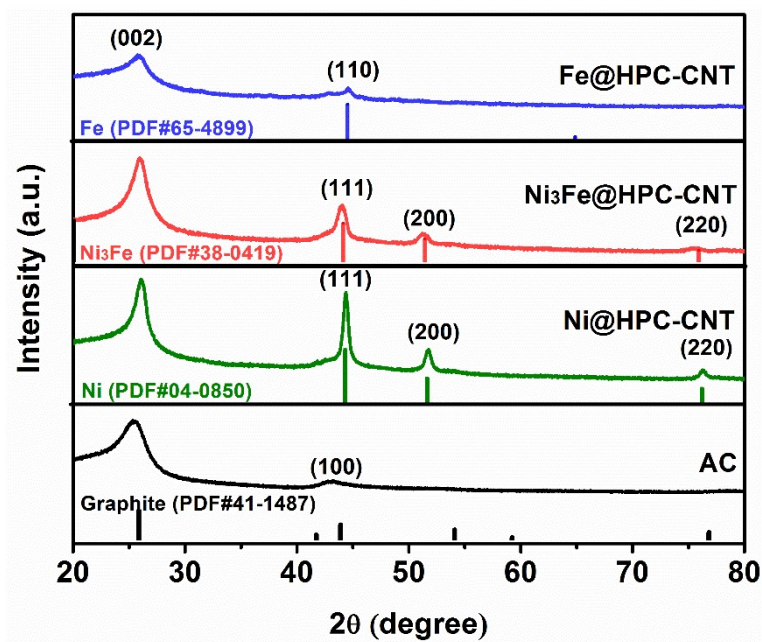

**Figure S3.** XRD patterns of AC and Ni-Fe samples (Ni@HPC-CNT, Ni<sub>3</sub>Fe@HPC-CNT and Fe@HPC-CNT).

As shown in Figure S3, the Ni<sub>3</sub>Fe@HPC-CNT sample exhibits three diffraction peaks at 44.2°, 51.5° and 75.3°, respectively, corresponding to the (111), (200) and (220) facets of Ni<sub>3</sub>Fe alloy (PDF#38-0419). The intense diffraction peak at 26.4° is attributed to the (002) plane of graphitic carbon (PDF#41-1487). Furthermore, the Ni@HPC-CNT and Fe@HPC-CNT exhibit the pure Ni and Fe phases, respectively, accompanied with graphitic carbon phase.

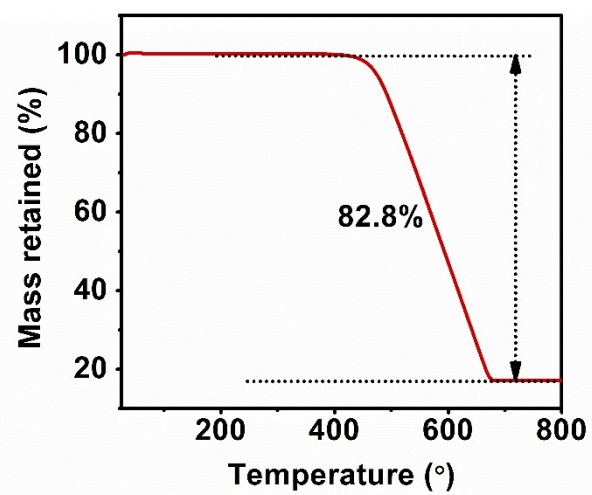

**Figure S4.** Thermogravimetric curve of Ni<sub>3</sub>Fe@HPC-CNT under air atmosphere.

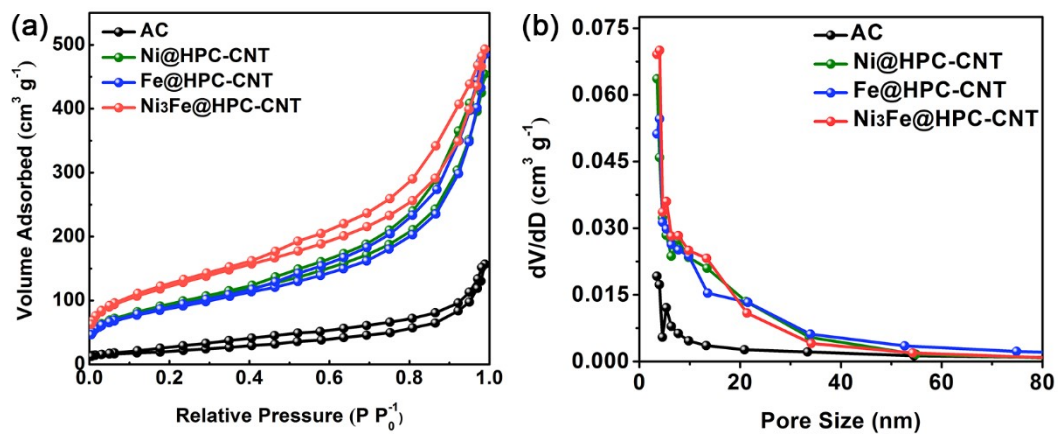

**Figure S5.** a) Nitrogen physisorption isotherms and b) corresponding pore-size distributions of the AC, Ni@HPC-CNT, Fe@HPC-CNT and Ni<sub>3</sub>Fe@HPC-CNT.

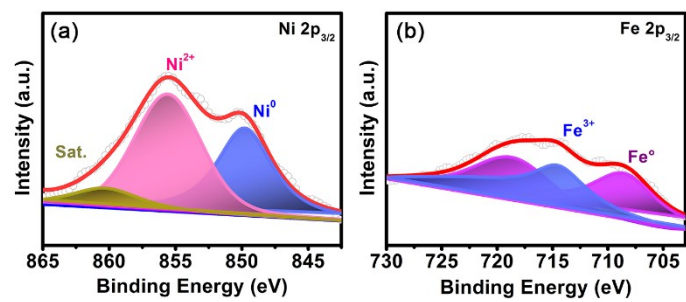

**Figure S6.** XPS spectra of a) Ni 2p<sub>3/2</sub> and b) Fe 2p<sub>3/2</sub> for Ni<sub>3</sub>Fe@HPC-CNT.

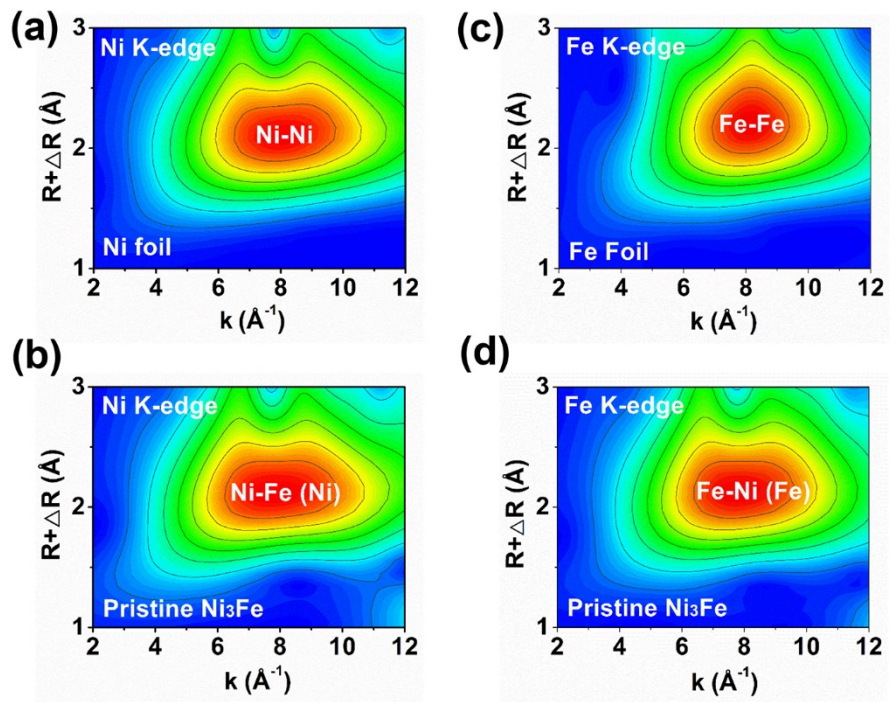

Figure S7. WT transform contour plots of a, b) Ni and c, d) Fe K-edge.

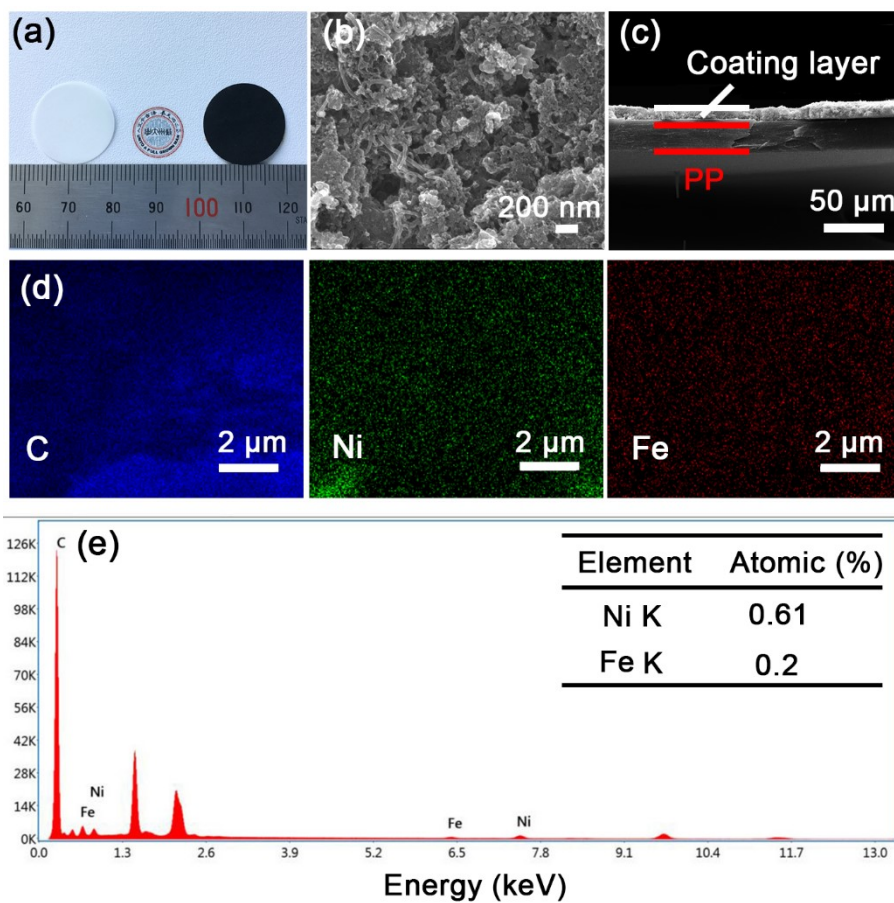

**Figure S8.** a) Photograph of the Ni<sub>3</sub>Fe@HPC-CNT modified separator. b) Top view and c) cross-sectional SEM images of the Ni<sub>3</sub>Fe@HPC-CNT modified separator. d) Elemental mappings and e) EDS image of Ni<sub>3</sub>Fe@HPC-CNT modified separator corresponding to the blue box area in Figure S8c.

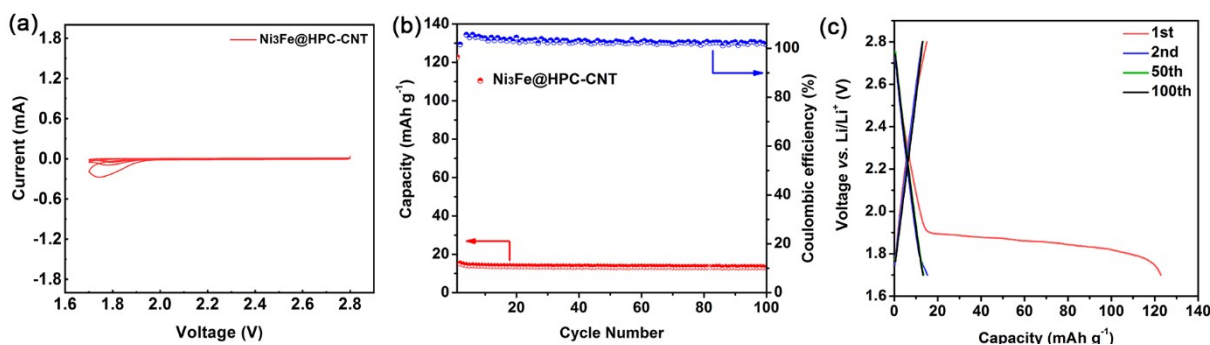

**Figure S9.** a) CV curves of Ni<sub>3</sub>Fe@HPC-CNT cathode without sulfur in voltage window of 1.7-2.8 V. b) Cycle performance and c) charge/discharge profiles of pure Ni<sub>3</sub>Fe@HPC-CNT cathode at 180 mA g<sup>-1</sup> after first cycle at 90 mA g<sup>-1</sup>.

As seen in Figure 2a, an additional cathodic peak at ~1.8 V is observed in Ni-Fe modified separator batteries, whereas no cathodic peak at ~1.8 V can be detected in PP and AC separator batteries. This phenomenon implies that the cathodic peak at ~1.8 V is associated with metals in the modified separators. To reveal the origin of cathodic peak at 1.8V and estimate the capacity contribution of Ni<sub>3</sub>Fe alloy, the batteries with Ni<sub>3</sub>Fe@HPC-CNT as the cathode (without sulfur) and lithium as the anode are assembled and tested under similar conditions. As seen in Figure S9, when using Ni<sub>3</sub>Fe@HPC-CNT cathode without sulfur, the typical cathodic peaks at 2.3 and 2.0 V as well as anodic peak at 2.4 V are disappeared. However, a small cathodic peak at around 1.8 V is still observed. This result suggests that the origin of cathodic peak at 1.8V derives from the partial lithiation of Ni<sub>3</sub>Fe alloy. Meanwhile, from the charge/discharge curves, the capacity of Ni<sub>3</sub>Fe@HPC-CNT is as low as 14 mAh g<sup>-1</sup>, which can be neglected when compared with the high special capacity (1675 mAh g<sup>-1</sup>) of sulfur.



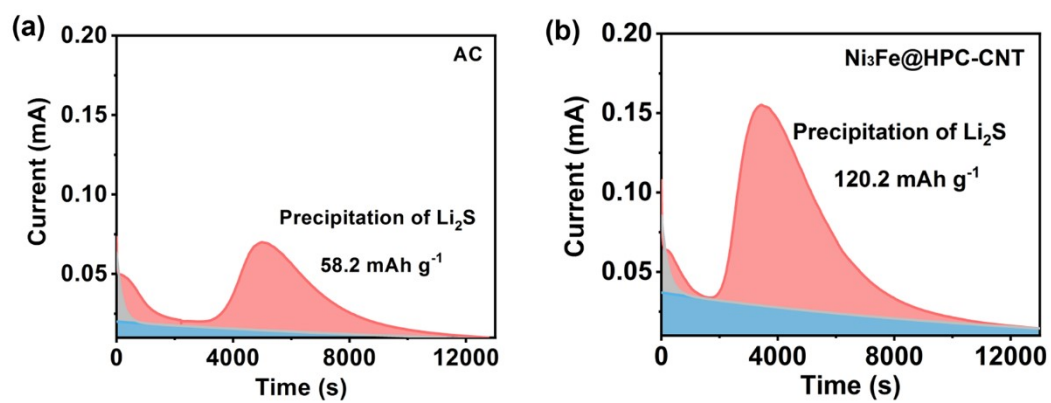

**Figure S10.** Potentiostatic discharge curves of Li<sub>2</sub>S<sub>8</sub> solution on the surface of (a) AC and (b) Ni<sub>3</sub>Fe@HPC-CNT electrode at 2.05 V.

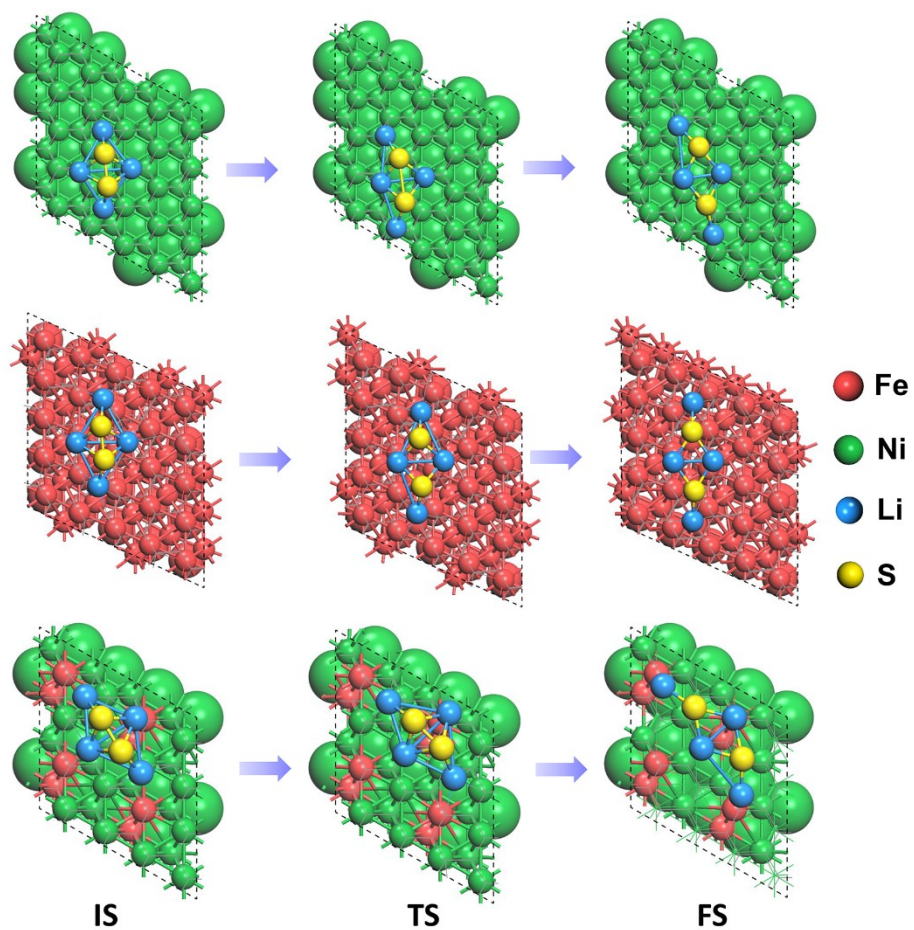

**Figure S11.** Initial state (IS), transition state (TS), and final state (FS) of  $\text{Li}_2\text{S}_2$  decomposition on the Ni, Fe and  $\text{Ni}_3\text{Fe}$  surface.

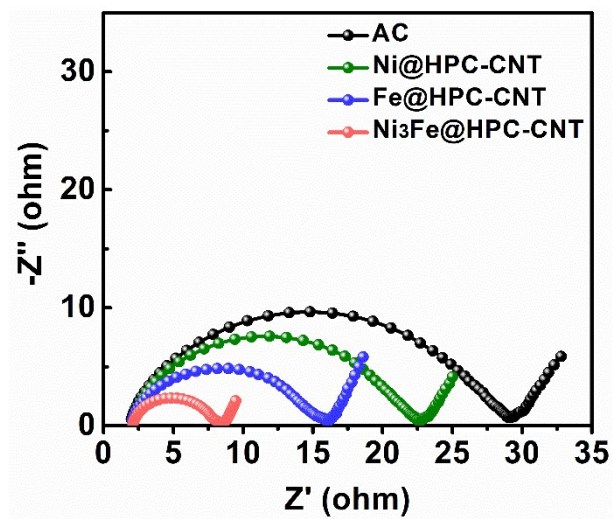

**Figure S12.** EIS spectra of  $\text{Li}_2\text{S}_6$  symmetric cells using AC, Ni@HPC-CNT, Fe@HPC-CNT and Ni<sub>3</sub>Fe@HPC-CNT electrodes.

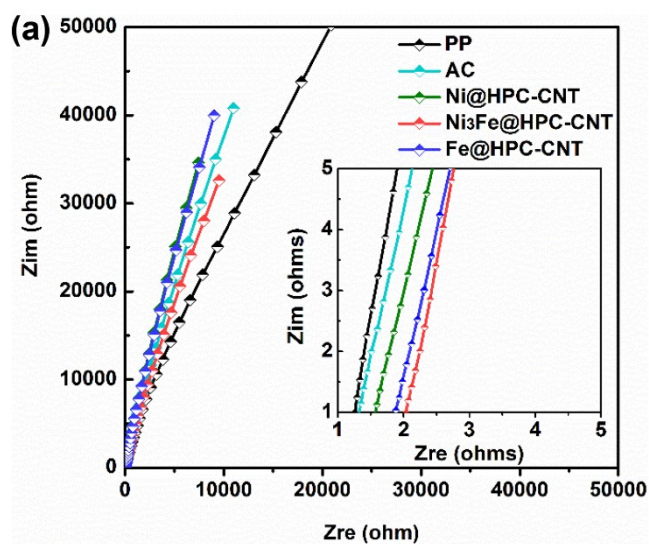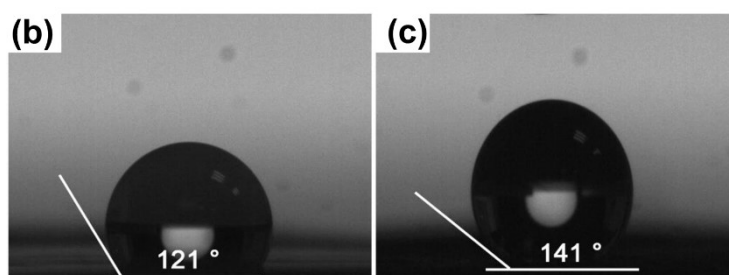

**Figure S13.** a) EIS plots of the symmetrical steel plate coin cells using different separators. Inset is the enlarged EIS plots at the high-frequency region. Contact angel of Ni<sub>3</sub>Fe@HPC-CNT modified separator b) and PP separator c) with electrolytes.

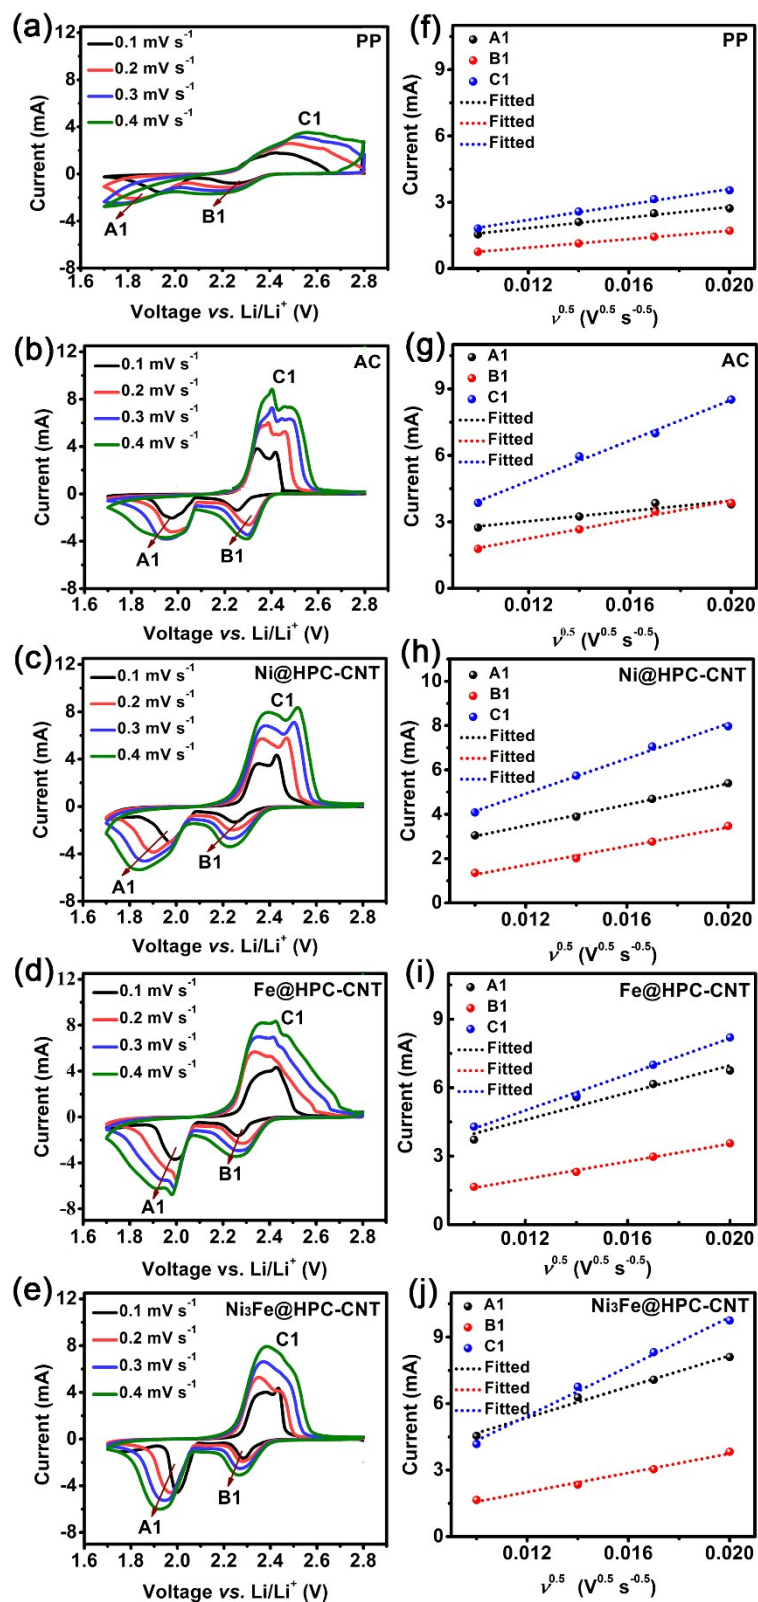

**Figure S14.** a-e) CV curves of Li-S batteries with different separators at various scan rates and f-j) corresponding linear fits of the redox peak currents.

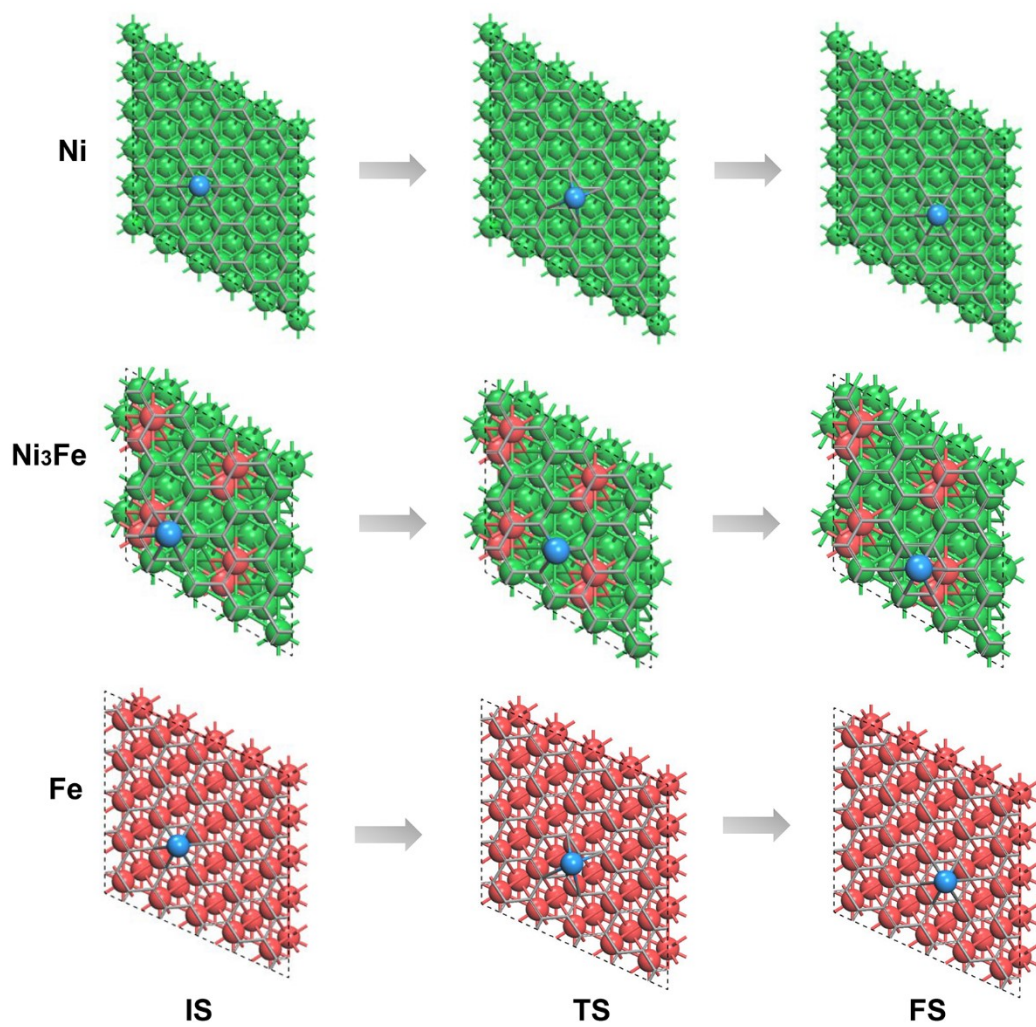

**Figure S15.** Initial state (IS), transition state (TS), and final state (FS) of  $\text{Li}^+$  diffusion on different surfaces.

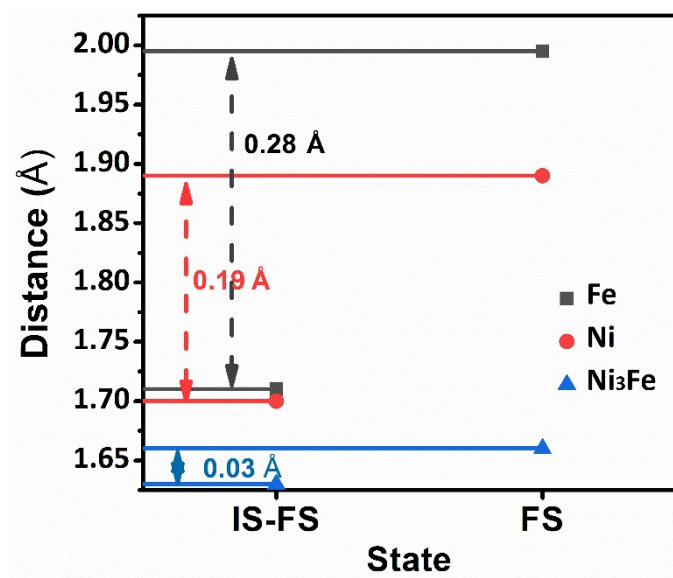

**Figure S16.** Distances between  $\text{Li}^+$  and metal surface from disposal direction during the diffusion process.

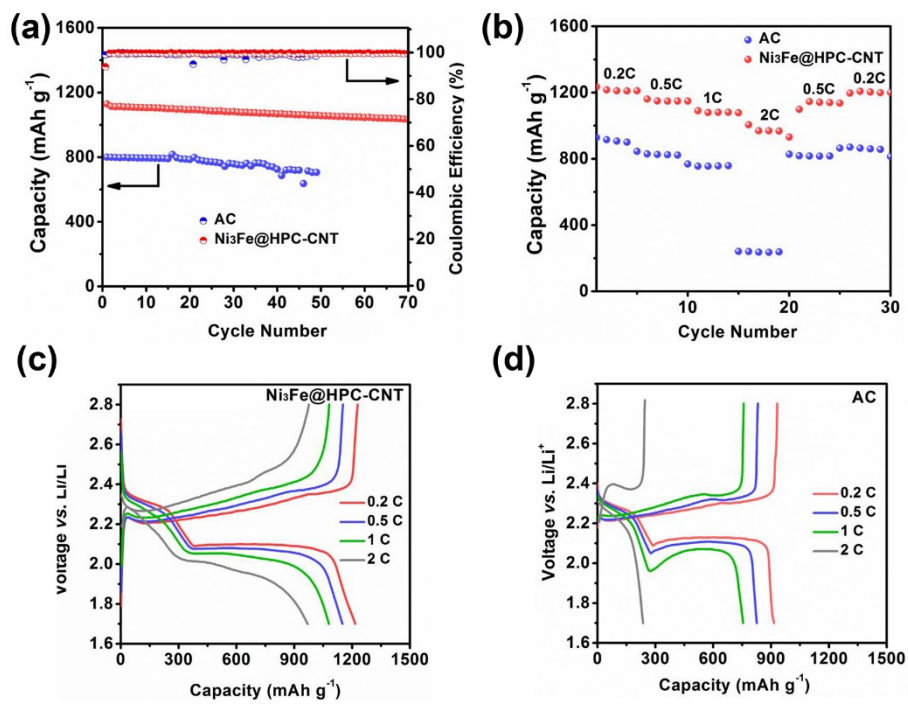

**Figure S17.** a) Cycle performance of  $\text{Ni}_3\text{Fe@HPC-CNT/S}$  and  $\text{AC/S}$  cathodes at 0.5 C. b) Rate performance of  $\text{Ni}_3\text{Fe@HPC-CNT/S}$  and  $\text{AC/S}$  cathodes from 0.2 C to 2 C. The corresponding charge/discharge curves of c)  $\text{Ni}_3\text{Fe@HPC-CNT/S}$  and d)  $\text{AC/S}$  cathodes at various rates.



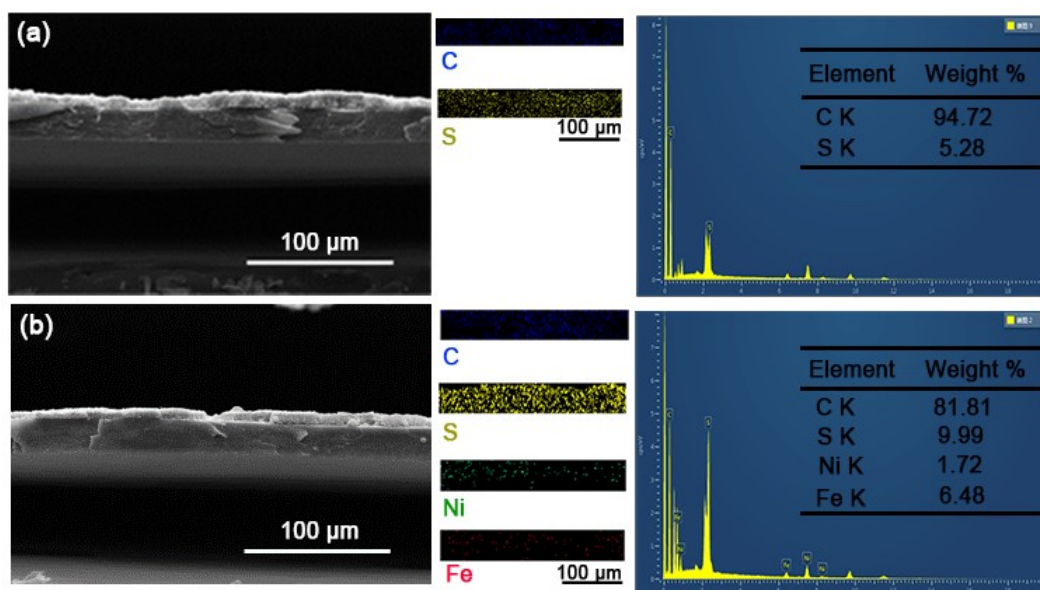

**Figure S18.** Cross-sectional SEM images, corresponding EDS and elemental mappings of a) AC modified separator and b) Ni<sub>3</sub>Fe@HPC-CNT modified separator after 800 cycles at 2 C.

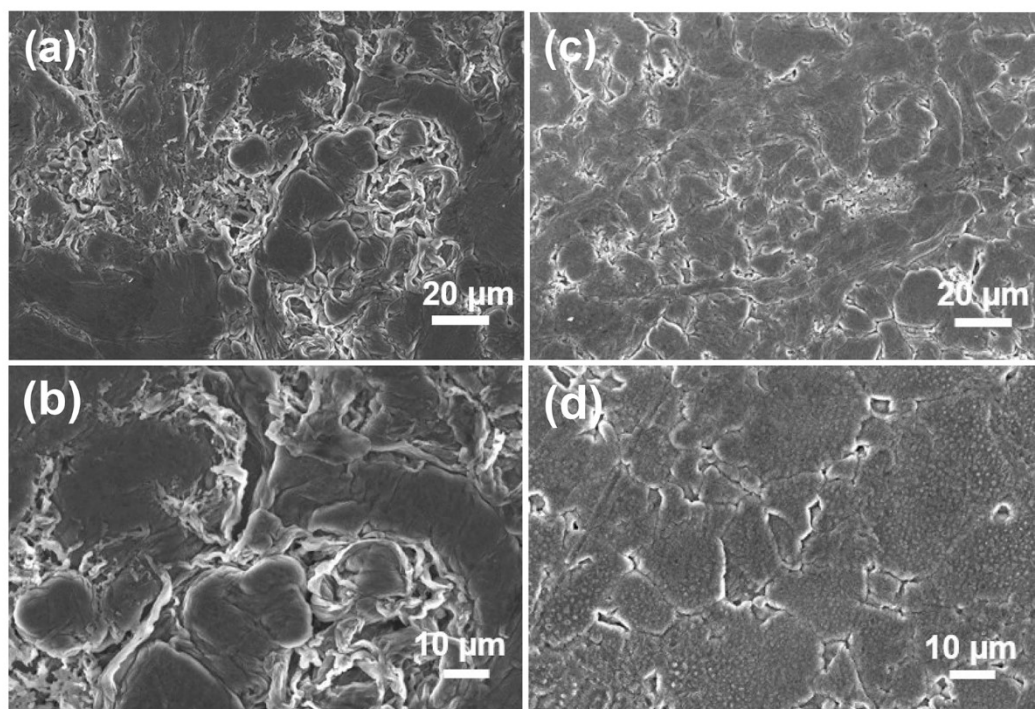

**Figure S19.** SEM images of the Li anodes for Li-S batteries using a, b) AC and c, d) Ni<sub>3</sub>Fe@HPC-CNT modified separators after 800 cycles at 2 C.

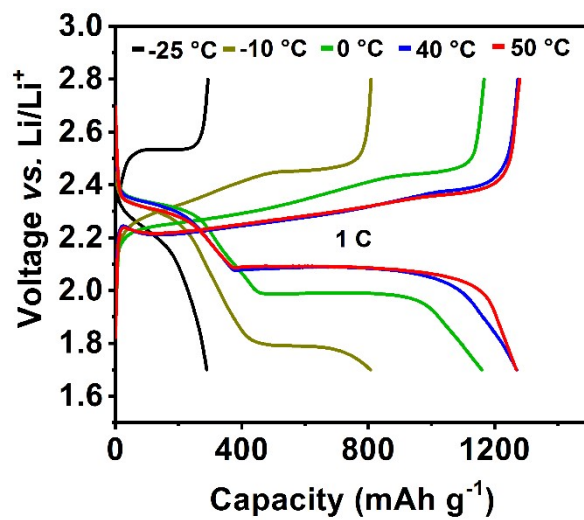

**Figure S20.** Charge/discharge curves of Li-S battery with Ni<sub>3</sub>Fe@HPC-CNT modified separator at 1 C from -25 °C to 50 °C.

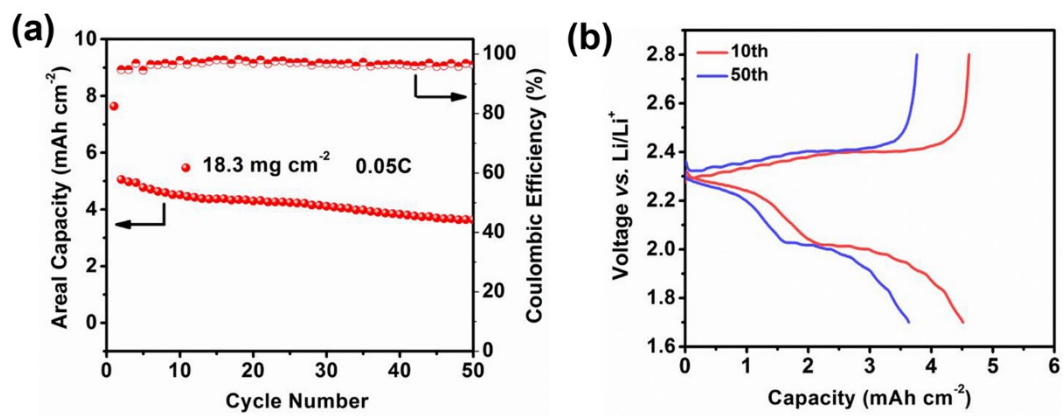

**Figure S21.** a) Cycling performance and b) charge/discharge curves of Ni<sub>3</sub>Fe@HPC-CNT/S cathode with pristine separator under high sulfur loadings and low E/S ratio of approximately 7 μL mg<sup>-1</sup> at 0.05 C.

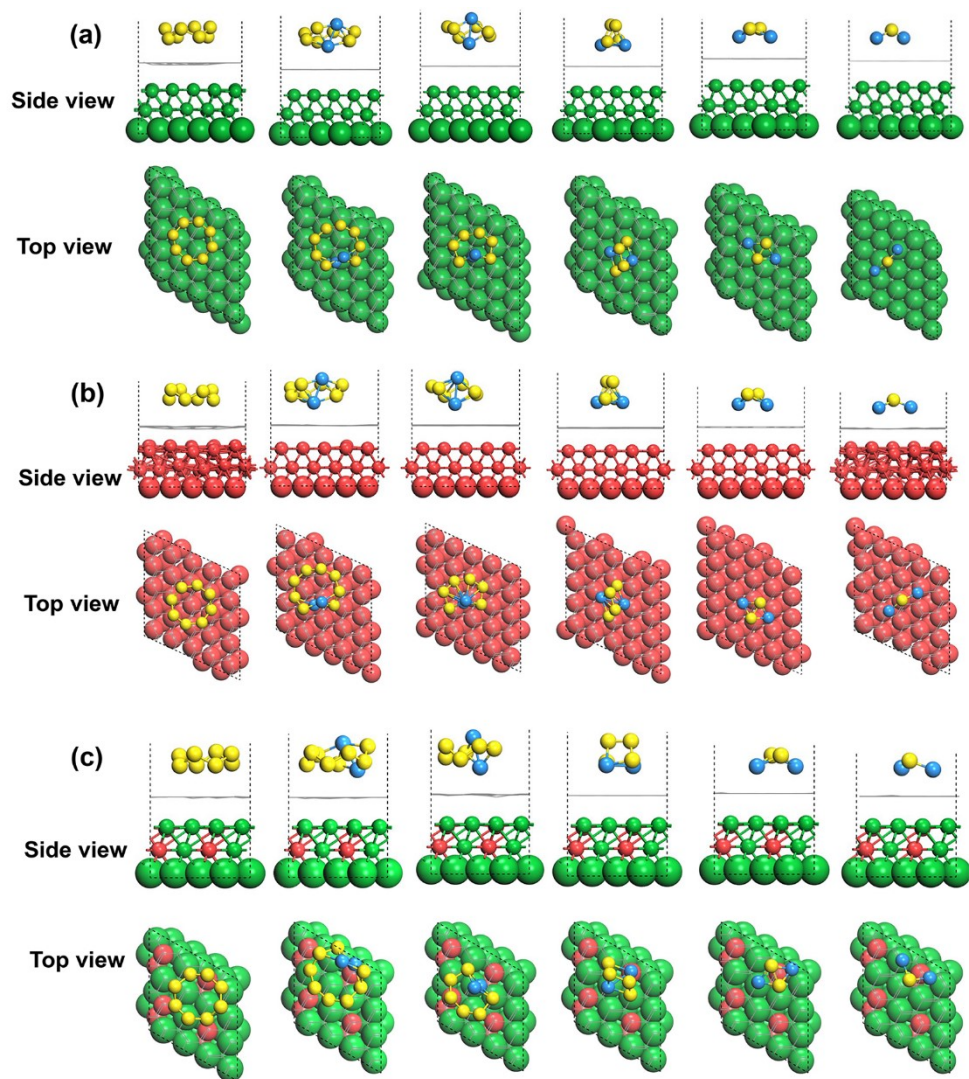

**Figure S22.** Optimized geometrical structures of  $S_8$  and  $Li_2S_x$  ( $x = 1, 2, 4, 6$  or  $8$ ) adsorbed on the a) Ni, b) Fe and c)  $Ni_3Fe$ .

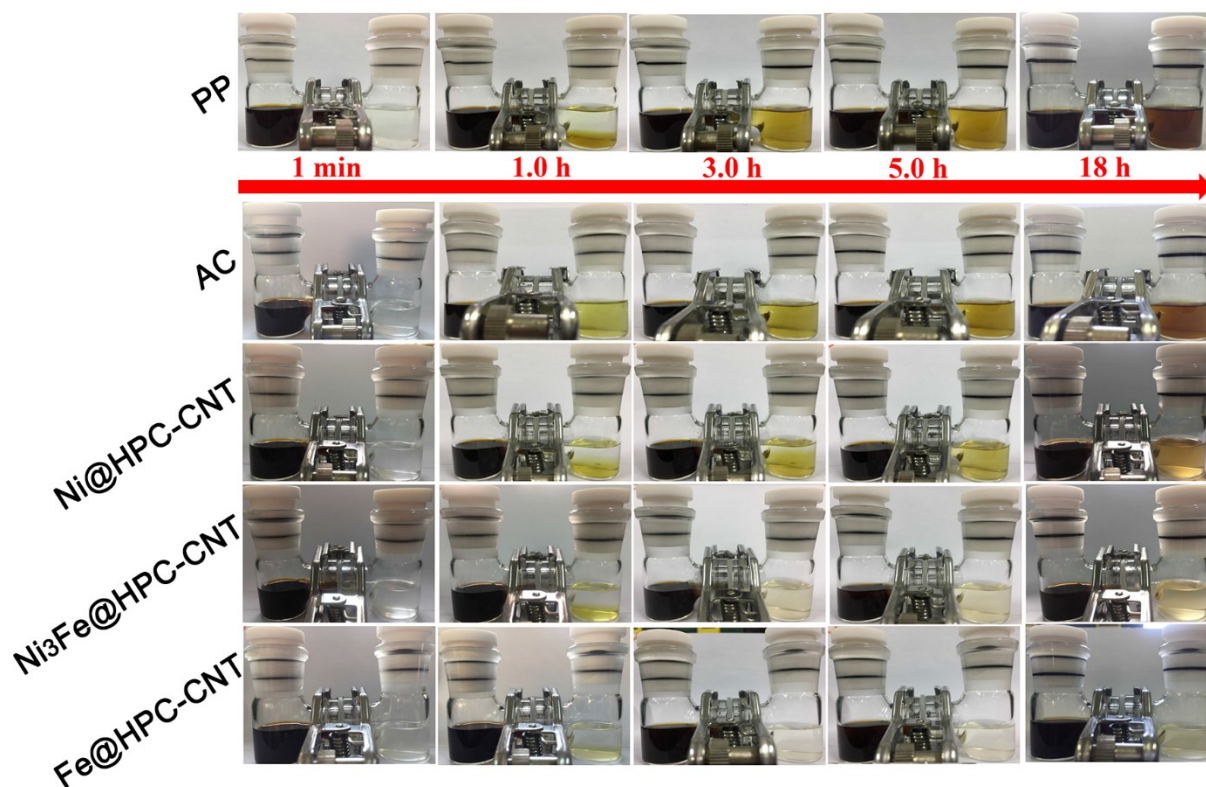

Figure S23. Polysulfide diffusion in H-type cells with different separators.

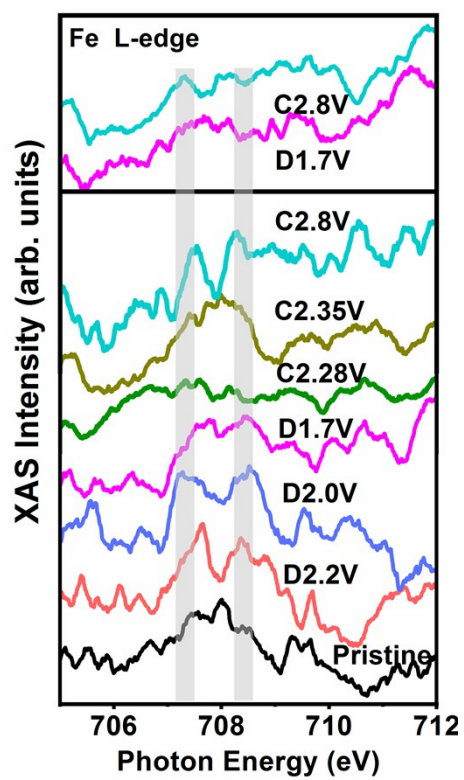

**Figure S24.** Fe L-edge XANES spectra of  $\text{Ni}_3\text{Fe}@\text{HPC-CNT}$  modified separators at different charge/discharge states and cycles.

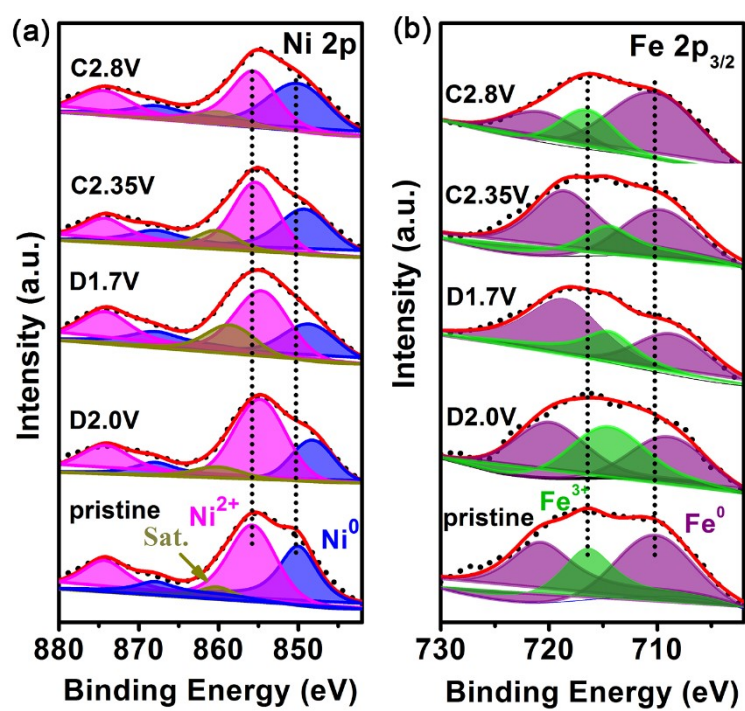

**Figure S25.** XPS spectra of a) Ni 2p and b) Fe 2p<sub>3/2</sub> of Ni<sub>3</sub>Fe@HPC-CNT modified separator at different charge/discharge states.



**Table S1.** ICP-AES results of Ni<sub>3</sub>Fe@HPC-CNT sample.

| Element        | Ni   | Fe   |
|----------------|------|------|
| Mass ratio (%) | 8.53 | 3.56 |

**Table S2.** BET specific surface area for all the compared samples.

| Samples                    | BET surface area (m <sup>2</sup> g <sup>-1</sup> ) | Pore volume (cm <sup>3</sup> g <sup>-1</sup> ) |
|----------------------------|----------------------------------------------------|------------------------------------------------|
| AC                         | 65                                                 | 0.24                                           |
| Ni@HPC-CNT                 | 230                                                | 0.70                                           |
| Ni <sub>3</sub> Fe@HPC-CNT | 227                                                | 0.75                                           |
| Fe@HPC-CNT                 | 253                                                | 0.76                                           |

**Table S3.** The Li<sup>+</sup> conductivity of various separators.

| Samples                                       | Li <sup>+</sup> conductivity [mS cm <sup>-1</sup> ] |
|-----------------------------------------------|-----------------------------------------------------|
| PP separator                                  | $1.82 \times 10^{-2}$                               |
| CNT modified separator                        | $1.69 \times 10^{-2}$                               |
| Ni@HPC-CNT modified separator                 | $1.39 \times 10^{-2}$                               |
| Ni <sub>3</sub> Fe@HPC-CNT modified separator | $1.14 \times 10^{-2}$                               |
| Fe@HPC-CNT modified separator                 | $1.08 \times 10^{-2}$                               |

**Table S4.** Summary of the Li<sup>+</sup> diffusion coefficient for Li-S batteries with different separators.

| Samples                    | $D_{Li^+}$ [cm <sup>2</sup> S <sup>-1</sup> ] |                       |                       |
|----------------------------|-----------------------------------------------|-----------------------|-----------------------|
|                            | A <sub>1</sub> Peak                           | B <sub>1</sub> Peak   | C <sub>1</sub> Peak   |
| PP                         | $1.94 \times 10^{-8}$                         | $1.24 \times 10^{-8}$ | $4.13 \times 10^{-8}$ |
| AC                         | $1.78 \times 10^{-8}$                         | $6.19 \times 10^{-8}$ | $2.82 \times 10^{-7}$ |
| Ni@HPC-CNT                 | $6.42 \times 10^{-8}$                         | $4.68 \times 10^{-8}$ | $3.77 \times 10^{-7}$ |
| Fe@HPC-CNT                 | $1.2 \times 10^{-7}$                          | $5.04 \times 10^{-8}$ | $2.11 \times 10^{-7}$ |
| Ni <sub>3</sub> Fe@HPC-CNT | $1.65 \times 10^{-7}$                         | $6.37 \times 10^{-8}$ | $4.19 \times 10^{-7}$ |

**Table S5.** Bader charge of  $\text{Li}^+$  on Fe, Ni and  $\text{Ni}_3\text{Fe}$  surface during the diffusion process.

|                             | IS-FS/e | TS/e  | Charge difference/e |
|-----------------------------|---------|-------|---------------------|
| Fe/Gra                      | 0.126   | 0.110 | 0.016               |
| Ni/Gra                      | 0.132   | 0.108 | 0.024               |
| $\text{Ni}_3\text{Fe}$ /Gra | 0.130   | 0.111 | 0.019               |

Because  $\text{Li}^+$  need climb only 0.03 Å on  $\text{Ni}_3\text{Fe}$  surface, and 0.19/0.28 Å on Ni /Fe surface during the diffusion process. The high distance for Ni and Fe indicates a strong bonding energy to overcome, which can be improved from the change of bader charge on adsorbed  $\text{Li}^+$  (Table S6).

**Table S6.** Electrochemical properties of various functional separators in Li-S batteries at room-temperature.

| References                                              | Coating materials                              | Sulfur content (wt%) | Mass loading of the coating (mg cm <sup>-2</sup> ) | Cycle Performance                       |          |                    | Rate Performance |
|---------------------------------------------------------|------------------------------------------------|----------------------|----------------------------------------------------|-----------------------------------------|----------|--------------------|------------------|
|                                                         |                                                |                      |                                                    | Initial capacity (mAh g <sup>-1</sup> ) | Rate (C) | Capacity decay (%) |                  |
| [4] <i>ACS nano</i> 2020, 14, 9819.                     | D-HVS                                          | 70                   | 0.14                                               | 1156                                    | 0.2 C    | 0.072 (300th)      | 630 (2 C)        |
| [5] <i>ACS Appl. Mater. Interfaces</i> 2020, 12, 19572. | Ni <sub>3</sub> Fe@NCNT                        | 70                   | 0.2                                                | 895                                     | 1 C      | 0.034 (1000th)     | 598 (4 C)        |
| [6] <i>Adv. Energy Mater.</i> 2018, 8, 1801778.         | LNS/CB                                         | 70                   | 0.7                                                | 1198                                    | 0.2 C    | 0.06 (500th)       | 758 (2 C)        |
| [8] <i>J. Mater. Chem. A</i> 2018, 6, 14359.            | MTN                                            | 70                   | --                                                 | 1032                                    | 0.2 C    | 0.09 (400th)       | 672 (3 C)        |
| [9] <i>ACS Energy Lett.</i> 2017, 2, 2362.              | ZIF-7                                          | 63                   | 1.2                                                | 1025                                    | 0.25 C   | 0.19 (300th)       | 452 (2.5 C)      |
| [41] <i>ACS Nano</i> 2018, 12, 836-843                  | ZBCP/GF/CNT                                    | 63                   | --                                                 | 1272                                    | 0.25 C   | 0.209 (200th)      | 610 (2.5 C)      |
| [42] <i>Adv. Funct. Mater.</i> 2016, 26, 7817.          | BaTiO <sub>3</sub>                             | 60                   | 2.4                                                | 1122                                    | 0.5 C    | 0.34 (50th)        | 300 (3 C)        |
| [43] <i>Adv. Mater.</i> 2017, 29, 1606817.              | MoS <sub>2</sub>                               | 65                   | --                                                 | 808                                     | 0.5 C    | 0.083 (600th)      | 550 (1 C)        |
| [37] <i>Adv. Mater.</i> 2019, 31, e1903813.             | SC-Co                                          | 63                   | 0.3                                                | 1130                                    | 0.5 C    | 0.086 (300th)      | 805 (3 C)        |
| [44] <i>ACS Nano</i> 2018, 12, 2381.                    | MXene (Ti <sub>3</sub> C <sub>2</sub> )        | 49                   | 0.4                                                | 899                                     | 0.5 C    | 0.266 (200th)      | 288 (10 C)       |
| [38] <i>Energy Environ. Sci.</i> 2018, 11, 2560.        | Co <sub>9</sub> S <sub>8</sub>                 | 70                   | 0.16                                               | 869                                     | 1 C      | 0.039(1000th)      | 428 (2 C)        |
| [39] <i>Chem. Comm.</i> 2020, 56, 3007.                 | 4Co-NCNTs                                      | 49                   | 0.23                                               | 872.3                                   | 1 C      | 0.072 (700th)      | 664 (2 C)        |
| [45] <i>Nanoscale</i> 2018, 10, 13694.                  | CoP nanospheres                                | 70                   | 0.2                                                | 928                                     | 1 C      | 0.078 (500th)      | 725 (5 C)        |
| [46] <i>Nano Energy</i> 2019, 59, 390.                  | Super P/RP                                     | 65                   | 0.3                                                | 890                                     | 1 C      | 0.18 (500th)       | 809 (2 C)        |
| [47] <i>ACS nano</i> 2017, 11, 2697.                    | CNTs/V <sub>2</sub> O <sub>5</sub> RSL         | 50                   | 0.4-0.6                                            | 1068                                    | 1 C      | 0.05 (250th)       | 614 (4 C)        |
| [48] <i>Adv. Energy Mater.</i> 2018, 8, 1702288         | MWCNTs/NCQ Ds                                  | 60                   | 0.15                                               | 1331                                    | 1 C      | 0.05 (500th)       | 666.7 (3 C)      |
| [3] <i>Matter</i> 2019, 1,                              | Li <sub>x</sub> Mo <sub>6</sub> S <sub>8</sub> | 54                   | 0.4                                                | 1056                                    | 1 C      | 0.07 (400th)       | 728 (4 C)        |

|                                                   |                                   |           |            |             |            |                     |                                  |
|---------------------------------------------------|-----------------------------------|-----------|------------|-------------|------------|---------------------|----------------------------------|
| 1047.                                             |                                   |           |            |             |            |                     |                                  |
| [22] <i>Adv. Mater.</i> 2020, 32, e1904876.       | Sb <sub>2</sub> Se <sub>3-x</sub> | 56        | 0.5        | 975         | 1 C        | 0.027 (500th)       | 787 (8 C)                        |
| [49] <i>ACS Nano</i> 2019, 13, 1923.              | Ce-MOF/CNT                        | --        | 0.4        | 1022        | 1 C        | 0.02 (800th)        | 663 (4 C)                        |
| [50] <i>Chem. Eng. J.</i> 2018, 349, 327.         | HNPC                              | 70        | 0.36       | 915         | 1 C        | 0.06 (900th)        | 674 (2 C)                        |
| [51] <i>Adv. Mater.</i> 2020, 32, e1906722.       | MOF-Co                            | 56        | --         | 800         | 1 C        | 0.07 (600th)        | 478 (5 C)                        |
| [52] <i>Adv. Mater.</i> 2019, 31, e1903955.       | Ni@NG                             | --        | 0.3        | 1059        | 1 C        | 0.06 (500th)        | 612 (10 C)                       |
| [53] <i>Chem. Sci.</i> 2017, 8, 6619.             | TiO-C65                           | 60        | 0.7        | 1047        | 2 C        | 0.16 (300th)        | 800 (1 C)                        |
| [54] <i>ACS Nano</i> 2018, 12, 10240.             | NHG                               | 61.2      | 0.1        | 868         | 2 C        | 0.06 (800th)        | 987 (2 C)                        |
| [55] <i>Adv. Mater.</i> 2016, 28, 9551.           | LDH/NG                            | 63        | 0.3        | 812         | 2 C        | 0.06 (1000th)       | 709 (2 C)                        |
| [56] <i>Chem. Eng. J.</i> 2020, 381, 122701.      | Co/NCNS/CNT                       | 64        | 0.2        | 972         | 2 C        | 0.05 (1000th)       | 842 (2 C)                        |
| [57] <i>Adv. Funct. Mater.</i> 2018, 28, 1706513. | LiF/GO                            | 64        | 0.15       | 721         | 2 C        | 0.043 (400th)       | 524 (3 C)                        |
| [12] <i>Adv. Energy Mater.</i> 2019, 9, 1901609.  | Co-N <sub>x</sub> NPC/G           | 60        | 0.2        | 964         | 2 C        | 0.087 (500th)       | 801 (5 C)                        |
| [20] <i>Adv. Mater.</i> 2020, 32, e1907444.       | OVs-TiO <sub>2</sub>              | 66.7      | 0.12       | 802         | 2 C        | 0.043 (500th)       | 751 (3 C)                        |
| <b>This work</b>                                  | <b>Ni<sub>3</sub>Fe@HPC-CNT</b>   | <b>70</b> | <b>0.3</b> | <b>1120</b> | <b>2 C</b> | <b>0.05 (800th)</b> | <b>800 (10 C)<br/>645 (15 C)</b> |

**Table S7.** Comparison of the low-temperature performance of Li-S batteries with representative work.

| References                                    | Cathode               | Separator                  | Temperature (°C) | Rate performance (mAh g <sup>-1</sup> ) |                                         |                                         | Cycle Performance (mAh g <sup>-1</sup> )               |
|-----------------------------------------------|-----------------------|----------------------------|------------------|-----------------------------------------|-----------------------------------------|-----------------------------------------|--------------------------------------------------------|
|                                               |                       |                            |                  | 0.5 C                                   | 1 C                                     | 2 C                                     |                                                        |
| [58] <i>Nano Energy</i> 2013, 2, 314.         | PGS-1000              | PP                         | -20              | 360                                     | --                                      | 234                                     | 175 (80th, 1C, -20 °C)                                 |
| [15] <i>ACS Nano</i> 2018, 12, 11120.         | BN/Graphene-S         | PP                         | 0<br>-20<br>-40  | 738<br>669<br>401                       | --<br>--<br>--                          | --<br>--<br>--                          | 500 (300th, 1C, -20 °C)                                |
| [13] <i>Adv. Energy Mater.</i> 2018, 1703638. | rGO-MoSe <sub>2</sub> | PP                         | 0<br>-25         | --<br>--                                | 779<br>272                              | --<br>--                                | 538 (500th, 0.5C, 0 °C)<br>253 (500th, 0.5C, -25 °C)   |
| [14] <i>Adv. Energy Mater.</i> 2020, 2000907. | Ni@C/graphene         | PP                         | -40<br>-50       | --<br>--                                | --<br>--                                | --<br>--                                | 354 (200th, 0.1C, -40 °C)<br>274 (400th, 0.1C, -50 °C) |
| <b>This work</b>                              | Pure S                | Ni <sub>3</sub> Fe@HPC-CNT | 0<br>-10<br>-25  | --<br>--<br>--                          | <b>1166</b><br><b>920</b><br><b>294</b> | <b>1038</b><br><b>420</b><br><b>225</b> | --<br>476 (400th, 0.5C, -10 °C)<br>--                  |



**Table S8.** Comparison of areal capacities of high-loading cathodes between this work and other literatures.

| References                                              | Cathode                 | separator                                         | Sulfur content | Sulfur mass loading (mg cm <sup>-2</sup> ) | Current density | Initial capacity (mAh cm <sup>-2</sup> ) | End capacity (mAh cm <sup>-2</sup> ) |
|---------------------------------------------------------|-------------------------|---------------------------------------------------|----------------|--------------------------------------------|-----------------|------------------------------------------|--------------------------------------|
| [5] <i>ACS Appl. Mater. Interfaces</i> 2020, 12, 19572. | super P/S               | Ni <sub>3</sub> Fe@NCNT                           | 70%            | 7.7                                        | 0.2 C           | 5.3                                      | 4.3 (150th)                          |
| [4] <i>ACS nano</i> 2020, 14, 9819.                     | Super P/S               | D-HVS                                             | 70%            | 9.2                                        | 0.2 C           | 8.3                                      | 6 (120th)                            |
| [42] <i>Adv. Funct. Mater.</i> 2016, 26, 7817.          | EC/S                    | BaTiO <sub>3</sub>                                | 60%            | 3                                          | 0.5 C           | 3.4                                      | 2.8 (50th)                           |
| [22] <i>Adv. Mater.</i> 2020, 32, e1904876.             | CNT/S                   | Sb <sub>2</sub> Se <sub>3</sub>                   | 56%            | 8.1                                        | 0.1 C           | 7.5                                      | 6.6 (100th)                          |
| [20] <i>Adv. Mater.</i> 2020, 32, e1907444.             | rGO/S                   | OVs-TiO <sub>2</sub>                              | 80%            | 7.1                                        | 0.2 C           | 6.7                                      | 5.83 (100th)                         |
| [51] <i>Adv. Mater.</i> 2020, 32, e1906722.             | C/S                     | MOF-Co                                            | 56%            | 7.8                                        | 0.5 C           | 7.8                                      | 5 (200th)                            |
| [11] <i>ACS nano</i> 2020, 14, 11558.                   | C/S                     | Co <sub>7</sub> Fe <sub>3</sub> @PGC-CNT          | 70%            | 6.7                                        | 0.1 C           | 6.5                                      | 4.7 (90th)                           |
| [47] <i>ACS nano</i> 2017, 11, 2697.                    | Carbon black/S          | CNTs/V <sub>2</sub> O <sub>5</sub> RSL interlayer | 70.4%          | 6                                          | 0.1 C           | 7.94                                     | 4.5 (100th)                          |
| [59] <i>Nano Energy</i> 2019, 64, 103905.               | rGO@S                   | NiCo-CNF@CF                                       | 56%            | 8                                          | 0.1 C           | 7.04                                     | ~5.8 (50th)                          |
| [60] <i>ACS nano</i> 2019, 13, 13235.                   | VTe <sub>2</sub> @MgO/S | PP                                                | 60%            | 6.9                                        | 0.1 C           | 6.5                                      | 4.3 (50th)                           |
| [61] <i>Matter</i> 2020, 2, 1-16.                       | eGF@S                   | PP                                                | 80%            | 20                                         | ~0.1 C          | 21                                       | 19 (70th)                            |
| [62] <i>ACS nano</i> 2019, 13, 14208.                   | Fe/Co-N@C/S             | PP                                                | 70%            | 6.5                                        | 0.1 C           | 8.7                                      | ~6.4                                 |
| [63] <i>Energ. Environ. Sci.</i> 2018, 11, 2620.        | VO <sub>2</sub> -VN/S   | PP                                                | 61.8%          | 13.2                                       | 0.05 C          | ~8.3                                     | 5.7 (20th)                           |
| [64] <i>Adv. Mater.</i> 2016, 28, 3374.                 | HCFF-S                  | PP                                                | 76%            | 21.2                                       | 0.05 C          | 23.2                                     | 14.8 (150th)                         |
| <b>In this work</b>                                     | CF/S                    | Ni <sub>3</sub> Fe@HPC-CNT                        | --             | <b>18.3</b>                                | 0.05 C          | <b>17.3</b>                              | <b>15 (50th)</b>                     |
|                                                         |                         |                                                   | 70%            | <b>30</b>                                  | 0.05 C          | <b>25.5</b>                              | <b>16 (50th)</b>                     |

**Note:** Taking the mass of the carbon fiber into account, the sulfur content is 70% for the Li-S battery using Ni<sub>3</sub>Fe@HPC-CNT modified separator.

**Table S9.** Peak intensity ratios ( $A_2/B_2$ ) of the Ni L-edge for the Ni<sub>3</sub>Fe@HPC-CNT.

| Potentials         | Intensity Ratios ( $A_2/B_2$ ) |
|--------------------|--------------------------------|
| Before discharging | 0.91                           |
| Discharge to 2.2 V | 0.94                           |
| Discharge to 2.0 V | 0.99                           |
| Discharge to 1.7 V | 0.99                           |
| Charge to 2.28 V   | 0.97                           |
| Charge to 2.35V    | 0.97                           |
| Charge to 2.8 V    | 0.96                           |
